# Supplementary material
Source: Springer Nature journal article supplement (https://www.springermedizin.de/resource/supplementary/12885_2007_884_MOESM5_ESM.pdf/9470588)

**p=0.0001**

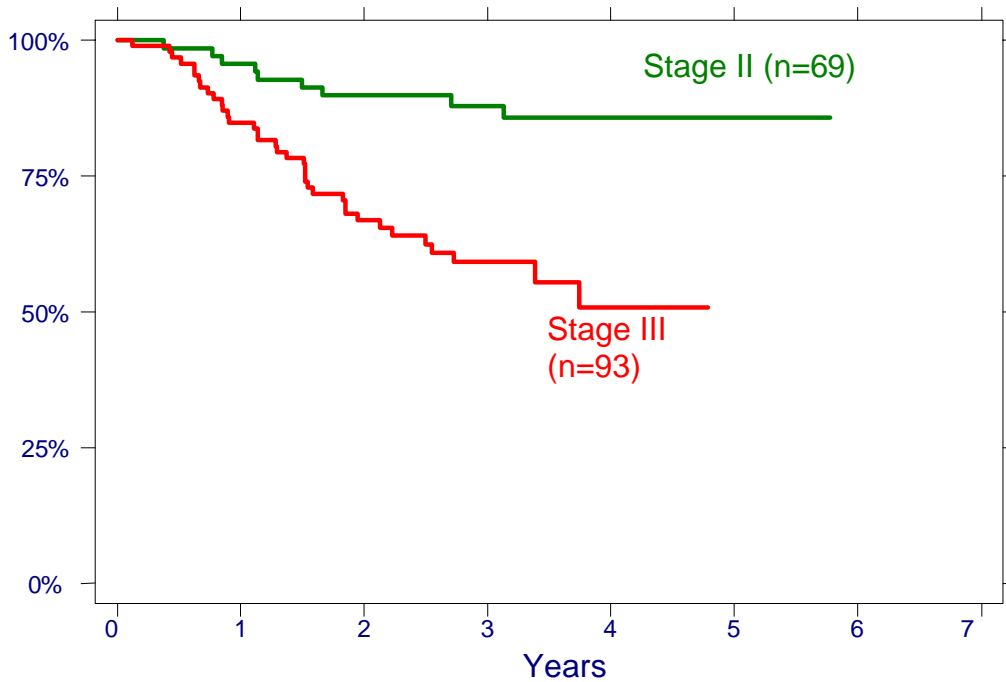

Supplement: MOESM5 [file 9470588]
